# Supplementary material
Source: publisher figshare collection journal article supplement (https://acs.figshare.com/ndownloader/files/5061136)
Supplement: Supplementary file 1 [file 5061136]

 
data_d:\x-single\7-serv\cy-31a\mulabs\cy-31a 
  
_audit_creation_method            SHELXL-97 
_chemical_name_systematic 
; 
 ? 
; 
_chemical_name_common             ? 
_chemical_melting_point           ? 
_chemical_formula_moiety          ? 
_chemical_formula_sum 
 'C29 H26 Cl2 Mn N2 O S14' 
_chemical_formula_weight          993.20 
  
loop_ 
 _atom_type_symbol 
 _atom_type_description 
 _atom_type_scat_dispersion_real 
 _atom_type_scat_dispersion_imag 
 _atom_type_scat_source 
 'C'  'C'   0.0033   0.0016 
 'International Tables Vol C Tables 4.2.6.8 and 6.1.1.4' 
 'H'  'H'   0.0000   0.0000 
 'International Tables Vol C Tables 4.2.6.8 and 6.1.1.4' 
 'Cl'  'Cl'   0.1484   0.1585 
 'International Tables Vol C Tables 4.2.6.8 and 6.1.1.4' 
 'Mn'  'Mn'   0.3368   0.7283 
 'International Tables Vol C Tables 4.2.6.8 and 6.1.1.4' 
 'N'  'N'   0.0061   0.0033 
 'International Tables Vol C Tables 4.2.6.8 and 6.1.1.4' 
 'O'  'O'   0.0106   0.0060 
 'International Tables Vol C Tables 4.2.6.8 and 6.1.1.4' 
 'S'  'S'   0.1246   0.1234 
 'International Tables Vol C Tables 4.2.6.8 and 6.1.1.4' 
  
_symmetry_cell_setting            orthorhombic 
_symmetry_space_group_name_H-M    'P 21 21 21' 
  
loop_ 
 _symmetry_equiv_pos_as_xyz 
 'x, y, z' 
 '-x+1/2, -y, z+1/2' 
 'x+1/2, -y+1/2, -z' 
 '-x, y+1/2, -z+1/2' 
  
_cell_length_a                    9.1967(6) 
_cell_length_b                    10.3605(7) 
_cell_length_c                    39.933(4) 
_cell_angle_alpha                 90.00 
_cell_angle_beta                  90.00 
_cell_angle_gamma                 90.00 
_cell_volume                      3804.9(5) 
_cell_formula_units_Z             4 
_cell_measurement_temperature     173(2) 
_cell_measurement_reflns_used     10751 
_cell_measurement_theta_min       2.03 
_cell_measurement_theta_max       25.52 
  
_exptl_crystal_description        needle 
_exptl_crystal_colour             orange 
_exptl_crystal_size_max           0.5 
_exptl_crystal_size_mid           0.15 
_exptl_crystal_size_min           0.05 
_exptl_crystal_density_meas       none 
_exptl_crystal_density_diffrn     1.734 
_exptl_crystal_density_method     'not measured' 
_exptl_crystal_F_000              2020 
_exptl_absorpt_coefficient_mu     1.287 
_exptl_absorpt_correction_type    multi-scan 
_exptl_absorpt_correction_T_min   0.727 
_exptl_absorpt_correction_T_max   0.772 
_exptl_absorpt_process_details    'MULABS, (PLATON03, Speck, 2003)' 
  
_exptl_special_details 
; 
 ? 
; 
  
_diffrn_ambient_temperature       173(2) 
_diffrn_radiation_wavelength      0.71073 
_diffrn_radiation_type            MoK\a 
_diffrn_radiation_source          'fine-focus sealed tube' 
_diffrn_radiation_monochromator   graphite 
_diffrn_measurement_device_type   'STOE IPDS 2' 
_diffrn_measurement_method        'rotation method' 
_diffrn_detector_area_resol_mean  6.67 
_diffrn_standards_number          ? 
_diffrn_standards_interval_count  ? 
_diffrn_standards_interval_time   ? 
_diffrn_standards_decay_%         ? 
_diffrn_reflns_number             23163 
_diffrn_reflns_av_R_equivalents   0.0751 
_diffrn_reflns_av_sigmaI/netI     0.1115 
_diffrn_reflns_limit_h_min        -10 
_diffrn_reflns_limit_h_max        10 
_diffrn_reflns_limit_k_min        -11 
_diffrn_reflns_limit_k_max        12 
_diffrn_reflns_limit_l_min        -47 
_diffrn_reflns_limit_l_max        47 
_diffrn_reflns_theta_min          2.03 
_diffrn_reflns_theta_max          25.17 
_reflns_number_total              6652 
_reflns_number_gt                 4026 
_reflns_threshold_expression      >2sigma(I) 
  
_computing_data_collection        'STOE X-AREA' 
_computing_cell_refinement        'STOE X-AREA' 
_computing_data_reduction         'STOE X-RED' 
_computing_structure_solution     'SHELXS-97 (Sheldrick, 1990)' 
_computing_structure_refinement   'SHELXL-97 (Sheldrick, 1997)' 
_computing_molecular_graphics     ? 
_computing_publication_material   ? 
  
_refine_special_details 
; 
 Refinement of F^2^ against ALL reflections.  The weighted R-factor wR and 
 goodness of fit S are based on F^2^, conventional R-factors R are based 
 on F, with F set to zero for negative F^2^. The threshold expression of 
 F^2^ > 2sigma(F^2^) is used only for calculating R-factors(gt) etc. and is 
 not relevant to the choice of reflections for refinement.  R-factors based 
 on F^2^ are statistically about twice as large as those based on F, and R- 
 factors based on ALL data will be even larger. 
; 
  
_refine_ls_structure_factor_coef  Fsqd 
_refine_ls_matrix_type            full 
_refine_ls_weighting_scheme       calc 
_refine_ls_weighting_details 
 'calc w=1/[\s^2^(Fo^2^)+(0.0205P)^2^+0.0000P] where P=(Fo^2^+2Fc^2^)/3' 
_atom_sites_solution_primary      direct 
_atom_sites_solution_secondary    difmap 
_atom_sites_solution_hydrogens    geom 
_refine_ls_hydrogen_treatment     mixed 
_refine_ls_extinction_method      none 
_refine_ls_extinction_coef        ? 
_refine_ls_abs_structure_details 
 'Flack H D (1983), Acta Cryst. A39, 876-881' 
_refine_ls_abs_structure_Flack    0.21(3) 
_refine_ls_number_reflns          6652 
_refine_ls_number_parameters      445 
_refine_ls_number_restraints      0 
_refine_ls_R_factor_all           0.0728 
_refine_ls_R_factor_gt            0.0380 
_refine_ls_wR_factor_ref          0.0665 
_refine_ls_wR_factor_gt           0.0605 
_refine_ls_goodness_of_fit_ref    0.753 
_refine_ls_restrained_S_all       0.753 
_refine_ls_shift/su_max           0.001 
_refine_ls_shift/su_mean          0.000 
  
loop_ 
 _atom_site_label 
 _atom_site_type_symbol 
 _atom_site_fract_x 
 _atom_site_fract_y 
 _atom_site_fract_z 
 _atom_site_U_iso_or_equiv 
 _atom_site_adp_type 
 _atom_site_occupancy 
 _atom_site_symmetry_multiplicity 
 _atom_site_calc_flag 
 _atom_site_refinement_flags 
 _atom_site_disorder_assembly 
 _atom_site_disorder_group 
C1 C -0.0110(7) -0.3047(5) -0.42637(13) 0.0299(16) Uani 1 1 d . . . 
H1A H 0.0642 -0.3508 -0.4375 0.036 Uiso 1 1 calc R . . 
C2 C -0.0094(7) -0.3016(5) -0.39189(13) 0.0327(16) Uani 1 1 d . . . 
H2A H 0.0621 -0.3487 -0.3798 0.039 Uiso 1 1 calc R . . 
C3 C -0.1126(9) -0.2297(6) -0.37485(13) 0.0270(17) Uani 1 1 d . . . 
C4 C -0.2166(7) -0.1665(5) -0.39385(12) 0.0277(14) Uani 1 1 d . . . 
H4A H -0.2894 -0.1157 -0.3833 0.033 Uiso 1 1 calc R . . 
C5 C -0.2133(7) -0.1782(5) -0.42842(12) 0.0295(15) Uani 1 1 d . . . 
H5A H -0.2865 -0.1356 -0.4410 0.035 Uiso 1 1 calc R . . 
C6 C -0.1185(9) -0.2271(6) -0.33729(13) 0.0350(18) Uani 1 1 d . . . 
H6B H -0.1691 -0.1485 -0.3294 0.042 Uiso 1 1 calc R . . 
H6A H -0.0190 -0.2280 -0.3278 0.042 Uiso 1 1 calc R . . 
C7 C -0.1551(8) -0.3967(6) -0.28389(13) 0.0323(17) Uani 1 1 d . . . 
C8 C -0.0702(8) -0.4962(6) -0.27527(13) 0.0364(17) Uani 1 1 d . . . 
H8A H -0.0370 -0.5558 -0.2916 0.044 Uiso 1 1 calc R . . 
C9 C -0.1155(8) -0.3752(5) -0.22040(12) 0.0309(16) Uani 1 1 d . . . 
C10 C -0.1162(7) -0.3358(6) -0.18841(12) 0.0319(16) Uani 1 1 d . . . 
C11 C -0.0949(7) -0.3245(5) -0.12415(12) 0.0274(16) Uani 1 1 d . . . 
C12 C -0.1500(8) -0.2739(6) -0.05819(13) 0.0374(18) Uani 1 1 d . . . 
H12A H -0.2515 -0.3057 -0.0575 0.045 Uiso 1 1 calc R . . 
H12B H -0.1108 -0.2782 -0.0351 0.045 Uiso 1 1 calc R . . 
C13 C -0.1508(7) -0.1349(6) -0.06940(13) 0.0368(16) Uani 1 1 d . . . 
H13A H -0.0495 -0.1069 -0.0736 0.044 Uiso 1 1 calc R . . 
H13B H -0.1905 -0.0806 -0.0511 0.044 Uiso 1 1 calc R . . 
C14 C -0.1766(7) -0.2234(5) -0.13255(13) 0.0254(15) Uani 1 1 d . . . 
C15 C -0.0456(8) -0.1721(6) -0.57629(12) 0.0285(14) Uani 1 1 d . . . 
H15A H 0.0038 -0.1049 -0.5648 0.034 Uiso 1 1 calc R . . 
C16 C -0.0451(7) -0.1705(5) -0.61067(13) 0.0309(15) Uani 1 1 d . . . 
H16A H 0.0032 -0.1031 -0.6223 0.037 Uiso 1 1 calc R . . 
C17 C -0.1156(8) -0.2680(5) -0.62842(14) 0.0244(16) Uani 1 1 d . . . 
C18 C -0.1826(7) -0.3638(5) -0.60961(12) 0.0278(15) Uani 1 1 d . . . 
H18A H -0.2302 -0.4333 -0.6206 0.033 Uiso 1 1 calc R . . 
C19 C -0.1803(7) -0.3585(5) -0.57506(12) 0.0284(15) Uani 1 1 d . . . 
H19A H -0.2286 -0.4243 -0.5628 0.034 Uiso 1 1 calc R . . 
C20 C -0.1148(9) -0.2713(6) -0.66589(13) 0.0324(17) Uani 1 1 d . . . 
H20B H -0.1583 -0.3528 -0.6740 0.039 Uiso 1 1 calc R . . 
H20A H -0.0139 -0.2655 -0.6744 0.039 Uiso 1 1 calc R . . 
C21 C -0.1562(7) -0.1131(6) -0.72126(13) 0.0299(17) Uani 1 1 d . . . 
C22 C -0.0805(7) -0.0099(6) -0.73069(13) 0.0344(17) Uani 1 1 d . . . 
H22A H -0.0522 0.0534 -0.7148 0.041 Uiso 1 1 calc R . . 
C23 C -0.1196(7) -0.1372(5) -0.78501(12) 0.0280(15) Uani 1 1 d . . . 
C24 C -0.1189(8) -0.1766(6) -0.81685(13) 0.0311(16) Uani 1 1 d . . . 
C25 C -0.1013(7) -0.1869(5) -0.88124(12) 0.0286(16) Uani 1 1 d . . . 
C26 C -0.0810(7) -0.2782(6) -0.94504(13) 0.0329(17) Uani 1 1 d . . . 
H26A H -0.0709 -0.2583 -0.9692 0.039 Uiso 1 1 calc R . . 
H26B H -0.0029 -0.3397 -0.9390 0.039 Uiso 1 1 calc R . . 
C27 C -0.2262(7) -0.3417(6) -0.93925(12) 0.0361(16) Uani 1 1 d . . . 
H27B H -0.2400 -0.4097 -0.9564 0.043 Uiso 1 1 calc R . . 
H27A H -0.3035 -0.2765 -0.9426 0.043 Uiso 1 1 calc R . . 
C28 C -0.1741(7) -0.2948(6) -0.87256(13) 0.0258(15) Uani 1 1 d . . . 
C29 C -0.1463(7) 0.0503(5) -0.49020(13) 0.0363(16) Uani 1 1 d . . . 
H29C H -0.1888 0.1258 -0.5013 0.054 Uiso 1 1 calc R . . 
H29B H -0.0405 0.0514 -0.4931 0.054 Uiso 1 1 calc R . . 
H29A H -0.1697 0.0526 -0.4663 0.054 Uiso 1 1 calc R . . 
Cl1 Cl -0.36732(15) -0.34365(11) -0.49906(3) 0.0293(3) Uani 1 1 d . . . 
Cl2 Cl -0.02290(15) -0.49554(11) -0.50102(3) 0.0299(3) Uani 1 1 d . . . 
Mn1 Mn -0.10972(9) -0.26681(7) -0.50152(2) 0.02311(19) Uani 1 1 d . . . 
N1 N -0.1118(7) -0.2469(4) -0.44511(12) 0.0255(14) Uani 1 1 d . . . 
N2 N -0.1124(7) -0.2639(4) -0.55804(11) 0.0224(13) Uani 1 1 d . . . 
O1 O -0.2048(4) -0.0651(3) -0.50474(8) 0.0281(9) Uani 1 1 d . . . 
H1O H -0.2926 -0.0562 -0.5170 0.042 Uiso 1 1 calc R . . 
S1 S -0.2181(2) -0.37151(15) -0.32457(3) 0.0397(5) Uani 1 1 d . . . 
S2 S -0.0223(2) -0.51384(16) -0.23357(4) 0.0385(5) Uani 1 1 d . . . 
S3 S -0.0213(2) -0.41761(15) -0.15665(4) 0.0394(5) Uani 1 1 d . . . 
S4 S -0.0449(2) -0.37933(16) -0.08447(3) 0.0359(4) Uani 1 1 d . . . 
S5 S -0.2567(2) -0.10891(15) -0.10667(3) 0.0368(4) Uani 1 1 d . . . 
S6 S -0.2045(2) -0.19544(16) -0.17549(4) 0.0389(5) Uani 1 1 d . . . 
S7 S -0.2075(2) -0.29108(17) -0.25204(3) 0.0378(5) Uani 1 1 d . . . 
S8 S -0.2212(2) -0.13346(15) -0.68044(3) 0.0367(4) Uani 1 1 d . . . 
S9 S -0.0347(2) 0.00727(16) -0.77245(3) 0.0384(4) Uani 1 1 d . . . 
S10 S -0.0340(2) -0.09000(15) -0.84904(3) 0.0355(4) Uani 1 1 d . . . 
S11 S -0.0569(2) -0.13117(15) -0.92126(3) 0.0326(4) Uani 1 1 d . . . 
S12 S -0.2489(2) -0.41329(14) -0.89845(4) 0.0358(4) Uani 1 1 d . . . 
S13 S -0.1978(2) -0.32254(15) -0.82969(3) 0.0409(5) Uani 1 1 d . . . 
S14 S -0.2013(2) -0.22477(16) -0.75243(3) 0.0376(5) Uani 1 1 d . . . 
  
loop_ 
 _atom_site_aniso_label 
 _atom_site_aniso_U_11 
 _atom_site_aniso_U_22 
 _atom_site_aniso_U_33 
 _atom_site_aniso_U_23 
 _atom_site_aniso_U_13 
 _atom_site_aniso_U_12 
C1 0.020(4) 0.036(4) 0.033(3) -0.003(3) -0.004(3) 0.000(3) 
C2 0.034(5) 0.039(3) 0.024(3) 0.003(3) 0.000(3) -0.006(3) 
C3 0.036(5) 0.028(3) 0.017(3) -0.001(2) -0.005(3) -0.010(3) 
C4 0.031(4) 0.030(3) 0.023(3) 0.003(2) 0.004(3) -0.003(3) 
C5 0.026(4) 0.035(3) 0.027(3) 0.002(2) 0.004(3) -0.001(3) 
C6 0.053(6) 0.026(3) 0.026(3) -0.002(3) -0.001(3) -0.009(4) 
C7 0.040(5) 0.033(4) 0.024(3) -0.004(3) 0.004(3) -0.006(3) 
C8 0.049(5) 0.031(4) 0.029(3) -0.005(3) 0.002(3) 0.001(4) 
C9 0.046(5) 0.023(3) 0.023(3) 0.002(3) -0.001(3) 0.008(3) 
C10 0.046(5) 0.028(3) 0.022(3) 0.000(2) 0.002(3) -0.003(3) 
C11 0.032(5) 0.026(3) 0.024(3) -0.005(2) 0.000(3) -0.002(3) 
C12 0.036(5) 0.052(4) 0.025(3) 0.003(3) 0.002(3) 0.002(3) 
C13 0.037(5) 0.044(4) 0.029(3) -0.013(3) -0.004(3) -0.002(3) 
C14 0.029(5) 0.019(3) 0.029(3) -0.003(3) 0.001(3) 0.005(3) 
C15 0.032(4) 0.033(3) 0.020(3) 0.000(2) -0.002(3) -0.001(3) 
C16 0.036(4) 0.029(3) 0.028(3) 0.004(2) 0.000(3) 0.001(3) 
C17 0.024(5) 0.027(3) 0.023(3) -0.001(3) -0.001(3) 0.002(3) 
C18 0.035(4) 0.026(3) 0.022(3) -0.007(2) 0.002(3) 0.003(3) 
C19 0.029(4) 0.029(3) 0.028(3) -0.002(3) 0.005(3) 0.001(3) 
C20 0.041(5) 0.034(4) 0.023(3) 0.007(3) 0.004(3) 0.007(3) 
C21 0.041(5) 0.027(3) 0.022(3) -0.003(3) 0.000(3) 0.006(3) 
C22 0.048(5) 0.033(4) 0.023(3) -0.010(3) -0.004(3) -0.006(4) 
C23 0.036(5) 0.027(3) 0.021(3) 0.001(2) 0.006(3) 0.001(3) 
C24 0.040(5) 0.028(3) 0.025(3) 0.000(3) 0.004(3) -0.006(3) 
C25 0.034(5) 0.028(3) 0.024(3) 0.001(2) -0.002(3) 0.001(3) 
C26 0.040(5) 0.037(3) 0.021(3) -0.010(2) -0.003(3) 0.004(3) 
C27 0.038(5) 0.040(4) 0.031(3) -0.004(3) -0.004(3) 0.004(3) 
C28 0.034(5) 0.022(3) 0.021(3) -0.001(2) -0.001(3) -0.002(3) 
C29 0.032(4) 0.039(3) 0.038(3) -0.001(3) -0.004(3) -0.005(3) 
Cl1 0.0223(8) 0.0355(7) 0.0301(6) -0.0015(7) 0.0007(7) 0.0004(6) 
Cl2 0.0309(9) 0.0299(6) 0.0289(6) 0.0007(6) 0.0007(7) 0.0023(7) 
Mn1 0.0221(5) 0.0282(4) 0.0190(3) -0.0005(4) -0.0006(5) 0.0017(4) 
N1 0.019(4) 0.029(3) 0.028(2) 0.002(2) 0.001(2) -0.002(2) 
N2 0.026(4) 0.025(3) 0.016(2) -0.0001(19) -0.002(2) 0.000(2) 
O1 0.032(3) 0.0277(19) 0.0250(18) -0.0033(16) -0.0098(19) -0.0039(18) 
S1 0.0608(15) 0.0353(9) 0.0230(7) 0.0034(7) -0.0041(8) -0.0149(10) 
S2 0.0547(14) 0.0322(9) 0.0287(7) -0.0026(7) -0.0005(8) 0.0084(9) 
S3 0.0553(14) 0.0380(9) 0.0249(7) -0.0020(7) -0.0014(8) 0.0158(9) 
S4 0.0470(12) 0.0376(9) 0.0231(7) -0.0004(7) -0.0059(7) 0.0042(9) 
S5 0.0438(13) 0.0366(9) 0.0301(7) -0.0041(7) 0.0003(7) 0.0081(8) 
S6 0.0572(15) 0.0340(9) 0.0254(7) -0.0004(7) -0.0012(8) 0.0102(9) 
S7 0.0547(14) 0.0350(9) 0.0238(7) 0.0015(7) -0.0002(8) 0.0067(10) 
S8 0.0484(14) 0.0384(9) 0.0233(7) 0.0047(7) 0.0040(7) 0.0095(9) 
S9 0.0601(14) 0.0320(8) 0.0232(7) -0.0012(7) 0.0047(8) -0.0095(9) 
S10 0.0514(13) 0.0326(9) 0.0224(7) -0.0002(6) 0.0026(7) -0.0093(9) 
S11 0.0450(12) 0.0309(8) 0.0219(7) 0.0013(6) 0.0021(7) -0.0033(8) 
S12 0.0471(14) 0.0305(8) 0.0297(7) -0.0003(7) -0.0042(7) -0.0043(8) 
S13 0.0677(16) 0.0313(9) 0.0238(7) 0.0004(6) 0.0018(8) -0.0129(9) 
S14 0.0586(15) 0.0326(9) 0.0215(7) 0.0025(6) 0.0016(8) -0.0073(9) 
  
_geom_special_details 
; 
 All esds (except the esd in the dihedral angle between two l.s. planes) 
 are estimated using the full covariance matrix.  The cell esds are taken 
 into account individually in the estimation of esds in distances, angles 
 and torsion angles; correlations between esds in cell parameters are only 
 used when they are defined by crystal symmetry.  An approximate (isotropic) 
 treatment of cell esds is used for estimating esds involving l.s. planes. 
; 
  
loop_ 
 _geom_bond_atom_site_label_1 
 _geom_bond_atom_site_label_2 
 _geom_bond_distance 
 _geom_bond_site_symmetry_2 
 _geom_bond_publ_flag 
C1 N1 1.333(8) . ? 
C1 C2 1.377(7) . ? 
C1 H1A 0.9500 . ? 
C2 C3 1.385(9) . ? 
C2 H2A 0.9500 . ? 
C3 C4 1.386(8) . ? 
C3 C6 1.501(7) . ? 
C4 C5 1.386(6) . ? 
C4 H4A 0.9500 . ? 
C5 N1 1.351(7) . ? 
C5 H5A 0.9500 . ? 
C6 S1 1.827(6) . ? 
C6 H6B 0.9900 . ? 
C6 H6A 0.9900 . ? 
C7 C8 1.338(9) . ? 
C7 S1 1.744(6) . ? 
C7 S7 1.746(6) . ? 
C8 S2 1.732(6) . ? 
C8 H8A 0.9500 . ? 
C9 C10 1.341(7) . ? 
C9 S7 1.752(6) . ? 
C9 S2 1.754(6) . ? 
C10 S6 1.743(6) . ? 
C10 S3 1.758(6) . ? 
C11 C14 1.333(8) . ? 
C11 S4 1.745(6) . ? 
C11 S3 1.753(5) . ? 
C12 C13 1.508(8) . ? 
C12 S4 1.797(6) . ? 
C12 H12A 0.9900 . ? 
C12 H12B 0.9900 . ? 
C13 S5 1.799(6) . ? 
C13 H13A 0.9900 . ? 
C13 H13B 0.9900 . ? 
C14 S5 1.736(6) . ? 
C14 S6 1.758(6) . ? 
C15 N2 1.347(7) . ? 
C15 C16 1.373(7) . ? 
C15 H15A 0.9500 . ? 
C16 C17 1.394(8) . ? 
C16 H16A 0.9500 . ? 
C17 C18 1.389(8) . ? 
C17 C20 1.496(7) . ? 
C18 C19 1.381(7) . ? 
C18 H18A 0.9500 . ? 
C19 N2 1.346(7) . ? 
C19 H19A 0.9500 . ? 
C20 S8 1.826(6) . ? 
C20 H20B 0.9900 . ? 
C20 H20A 0.9900 . ? 
C21 C22 1.331(8) . ? 
C21 S8 1.749(6) . ? 
C21 S14 1.749(6) . ? 
C22 S9 1.729(6) . ? 
C22 H22A 0.9500 . ? 
C23 C24 1.335(7) . ? 
C23 S14 1.755(6) . ? 
C23 S9 1.762(6) . ? 
C24 S10 1.751(6) . ? 
C24 S13 1.753(6) . ? 
C25 C28 1.349(8) . ? 
C25 S10 1.744(6) . ? 
C25 S11 1.748(5) . ? 
C26 C27 1.507(9) . ? 
C26 S11 1.809(5) . ? 
C26 H26A 0.9900 . ? 
C26 H26B 0.9900 . ? 
C27 S12 1.802(5) . ? 
C27 H27B 0.9900 . ? 
C27 H27A 0.9900 . ? 
C28 S12 1.746(6) . ? 
C28 S13 1.749(5) . ? 
C29 O1 1.434(5) . ? 
C29 H29C 0.9800 . ? 
C29 H29B 0.9800 . ? 
C29 H29A 0.9800 . ? 
Cl1 Mn1 2.5012(16) . ? 
Cl1 Mn1 2.5060(16) 3_444 ? 
Cl2 Mn1 2.5007(14) . ? 
Mn1 N2 2.257(4) . ? 
Mn1 N1 2.262(5) . ? 
Mn1 O1 2.269(3) . ? 
Mn1 Cl1 2.5060(16) 3_544 ? 
O1 H1O 0.9500 . ? 
  
loop_ 
 _geom_angle_atom_site_label_1 
 _geom_angle_atom_site_label_2 
 _geom_angle_atom_site_label_3 
 _geom_angle 
 _geom_angle_site_symmetry_1 
 _geom_angle_site_symmetry_3 
 _geom_angle_publ_flag 
N1 C1 C2 123.9(6) . . ? 
N1 C1 H1A 118.0 . . ? 
C2 C1 H1A 118.0 . . ? 
C1 C2 C3 119.8(6) . . ? 
C1 C2 H2A 120.1 . . ? 
C3 C2 H2A 120.1 . . ? 
C2 C3 C4 117.3(5) . . ? 
C2 C3 C6 121.7(6) . . ? 
C4 C3 C6 120.9(6) . . ? 
C3 C4 C5 119.3(6) . . ? 
C3 C4 H4A 120.4 . . ? 
C5 C4 H4A 120.4 . . ? 
N1 C5 C4 123.6(6) . . ? 
N1 C5 H5A 118.2 . . ? 
C4 C5 H5A 118.2 . . ? 
C3 C6 S1 106.3(4) . . ? 
C3 C6 H6B 110.5 . . ? 
S1 C6 H6B 110.5 . . ? 
C3 C6 H6A 110.5 . . ? 
S1 C6 H6A 110.5 . . ? 
H6B C6 H6A 108.7 . . ? 
C8 C7 S1 123.3(4) . . ? 
C8 C7 S7 117.1(4) . . ? 
S1 C7 S7 119.5(4) . . ? 
C7 C8 S2 118.5(4) . . ? 
C7 C8 H8A 120.7 . . ? 
S2 C8 H8A 120.7 . . ? 
C10 C9 S7 122.2(5) . . ? 
C10 C9 S2 122.5(5) . . ? 
S7 C9 S2 115.3(3) . . ? 
C9 C10 S6 122.5(5) . . ? 
C9 C10 S3 122.5(5) . . ? 
S6 C10 S3 114.8(3) . . ? 
C14 C11 S4 129.3(4) . . ? 
C14 C11 S3 117.7(4) . . ? 
S4 C11 S3 113.0(4) . . ? 
C13 C12 S4 114.2(4) . . ? 
C13 C12 H12A 108.7 . . ? 
S4 C12 H12A 108.7 . . ? 
C13 C12 H12B 108.7 . . ? 
S4 C12 H12B 108.7 . . ? 
H12A C12 H12B 107.6 . . ? 
C12 C13 S5 113.0(4) . . ? 
C12 C13 H13A 109.0 . . ? 
S5 C13 H13A 109.0 . . ? 
C12 C13 H13B 109.0 . . ? 
S5 C13 H13B 109.0 . . ? 
H13A C13 H13B 107.8 . . ? 
C11 C14 S5 128.8(4) . . ? 
C11 C14 S6 117.2(4) . . ? 
S5 C14 S6 114.0(3) . . ? 
N2 C15 C16 123.4(5) . . ? 
N2 C15 H15A 118.3 . . ? 
C16 C15 H15A 118.3 . . ? 
C15 C16 C17 119.9(6) . . ? 
C15 C16 H16A 120.0 . . ? 
C17 C16 H16A 120.0 . . ? 
C18 C17 C16 116.7(5) . . ? 
C18 C17 C20 121.8(5) . . ? 
C16 C17 C20 121.5(6) . . ? 
C19 C18 C17 120.4(5) . . ? 
C19 C18 H18A 119.8 . . ? 
C17 C18 H18A 119.8 . . ? 
N2 C19 C18 122.7(5) . . ? 
N2 C19 H19A 118.7 . . ? 
C18 C19 H19A 118.7 . . ? 
C17 C20 S8 107.3(4) . . ? 
C17 C20 H20B 110.2 . . ? 
S8 C20 H20B 110.2 . . ? 
C17 C20 H20A 110.2 . . ? 
S8 C20 H20A 110.2 . . ? 
H20B C20 H20A 108.5 . . ? 
C22 C21 S8 122.7(4) . . ? 
C22 C21 S14 117.0(4) . . ? 
S8 C21 S14 120.1(4) . . ? 
C21 C22 S9 118.9(4) . . ? 
C21 C22 H22A 120.6 . . ? 
S9 C22 H22A 120.6 . . ? 
C24 C23 S14 123.4(5) . . ? 
C24 C23 S9 121.9(4) . . ? 
S14 C23 S9 114.7(3) . . ? 
C23 C24 S10 123.0(5) . . ? 
C23 C24 S13 122.7(5) . . ? 
S10 C24 S13 114.3(3) . . ? 
C28 C25 S10 117.6(4) . . ? 
C28 C25 S11 128.7(4) . . ? 
S10 C25 S11 113.7(3) . . ? 
C27 C26 S11 113.3(4) . . ? 
C27 C26 H26A 108.9 . . ? 
S11 C26 H26A 108.9 . . ? 
C27 C26 H26B 108.9 . . ? 
S11 C26 H26B 108.9 . . ? 
H26A C26 H26B 107.7 . . ? 
C26 C27 S12 114.9(4) . . ? 
C26 C27 H27B 108.5 . . ? 
S12 C27 H27B 108.5 . . ? 
C26 C27 H27A 108.5 . . ? 
S12 C27 H27A 108.5 . . ? 
H27B C27 H27A 107.5 . . ? 
C25 C28 S12 128.8(4) . . ? 
C25 C28 S13 116.7(4) . . ? 
S12 C28 S13 114.5(3) . . ? 
O1 C29 H29C 109.5 . . ? 
O1 C29 H29B 109.5 . . ? 
H29C C29 H29B 109.5 . . ? 
O1 C29 H29A 109.5 . . ? 
H29C C29 H29A 109.5 . . ? 
H29B C29 H29A 109.5 . . ? 
Mn1 Cl1 Mn1 134.23(5) . 3_444 ? 
N2 Mn1 N1 173.90(17) . . ? 
N2 Mn1 O1 85.80(15) . . ? 
N1 Mn1 O1 88.23(14) . . ? 
N2 Mn1 Cl2 91.39(13) . . ? 
N1 Mn1 Cl2 94.65(12) . . ? 
O1 Mn1 Cl2 175.06(10) . . ? 
N2 Mn1 Cl1 91.90(16) . . ? 
N1 Mn1 Cl1 88.97(16) . . ? 
O1 Mn1 Cl1 86.01(10) . . ? 
Cl2 Mn1 Cl1 90.03(5) . . ? 
N2 Mn1 Cl1 90.74(16) . 3_544 ? 
N1 Mn1 Cl1 87.51(16) . 3_544 ? 
O1 Mn1 Cl1 85.56(10) . 3_544 ? 
Cl2 Mn1 Cl1 98.55(5) . 3_544 ? 
Cl1 Mn1 Cl1 170.96(4) . 3_544 ? 
C1 N1 C5 116.1(5) . . ? 
C1 N1 Mn1 120.8(4) . . ? 
C5 N1 Mn1 123.1(4) . . ? 
C19 N2 C15 116.9(4) . . ? 
C19 N2 Mn1 120.0(4) . . ? 
C15 N2 Mn1 123.1(4) . . ? 
C29 O1 Mn1 126.9(3) . . ? 
C29 O1 H1O 116.5 . . ? 
Mn1 O1 H1O 116.5 . . ? 
C7 S1 C6 102.4(3) . . ? 
C8 S2 C9 94.4(3) . . ? 
C11 S3 C10 94.4(3) . . ? 
C11 S4 C12 101.0(3) . . ? 
C14 S5 C13 99.3(3) . . ? 
C10 S6 C14 94.8(3) . . ? 
C7 S7 C9 94.6(3) . . ? 
C21 S8 C20 102.0(3) . . ? 
C22 S9 C23 94.6(3) . . ? 
C25 S10 C24 95.1(3) . . ? 
C25 S11 C26 100.0(3) . . ? 
C28 S12 C27 101.6(3) . . ? 
C28 S13 C24 95.3(3) . . ? 
C21 S14 C23 94.8(3) . . ? 
  
loop_ 
 _geom_torsion_atom_site_label_1 
 _geom_torsion_atom_site_label_2 
 _geom_torsion_atom_site_label_3 
 _geom_torsion_atom_site_label_4 
 _geom_torsion 
 _geom_torsion_site_symmetry_1 
 _geom_torsion_site_symmetry_2 
 _geom_torsion_site_symmetry_3 
 _geom_torsion_site_symmetry_4 
 _geom_torsion_publ_flag 
N1 C1 C2 C3 -3.5(9) . . . . ? 
C1 C2 C3 C4 1.9(9) . . . . ? 
C1 C2 C3 C6 177.8(6) . . . . ? 
C2 C3 C4 C5 0.2(9) . . . . ? 
C6 C3 C4 C5 -175.7(5) . . . . ? 
C3 C4 C5 N1 -1.2(9) . . . . ? 
C2 C3 C6 S1 -82.4(7) . . . . ? 
C4 C3 C6 S1 93.4(6) . . . . ? 
S1 C7 C8 S2 -177.1(4) . . . . ? 
S7 C7 C8 S2 1.1(8) . . . . ? 
S7 C9 C10 S6 -1.7(9) . . . . ? 
S2 C9 C10 S6 178.1(4) . . . . ? 
S7 C9 C10 S3 -178.7(4) . . . . ? 
S2 C9 C10 S3 1.1(9) . . . . ? 
S4 C12 C13 S5 71.8(6) . . . . ? 
S4 C11 C14 S5 2.1(10) . . . . ? 
S3 C11 C14 S5 -176.5(4) . . . . ? 
S4 C11 C14 S6 179.6(4) . . . . ? 
S3 C11 C14 S6 1.0(7) . . . . ? 
N2 C15 C16 C17 -0.4(10) . . . . ? 
C15 C16 C17 C18 -0.6(10) . . . . ? 
C15 C16 C17 C20 -178.7(6) . . . . ? 
C16 C17 C18 C19 1.4(9) . . . . ? 
C20 C17 C18 C19 179.5(6) . . . . ? 
C17 C18 C19 N2 -1.2(9) . . . . ? 
C18 C17 C20 S8 114.5(6) . . . . ? 
C16 C17 C20 S8 -67.5(8) . . . . ? 
S8 C21 C22 S9 -174.5(4) . . . . ? 
S14 C21 C22 S9 0.7(8) . . . . ? 
S14 C23 C24 S10 -178.7(4) . . . . ? 
S9 C23 C24 S10 0.2(9) . . . . ? 
S14 C23 C24 S13 -1.0(9) . . . . ? 
S9 C23 C24 S13 177.9(4) . . . . ? 
S11 C26 C27 S12 -70.3(5) . . . . ? 
S10 C25 C28 S12 -177.7(4) . . . . ? 
S11 C25 C28 S12 -0.5(10) . . . . ? 
S10 C25 C28 S13 2.0(7) . . . . ? 
S11 C25 C28 S13 179.2(4) . . . . ? 
Mn1 Cl1 Mn1 N2 -87.61(14) 3_444 . . . ? 
Mn1 Cl1 Mn1 N1 86.34(14) 3_444 . . . ? 
Mn1 Cl1 Mn1 O1 -1.96(11) 3_444 . . . ? 
Mn1 Cl1 Mn1 Cl2 -179.00(8) 3_444 . . . ? 
Mn1 Cl1 Mn1 Cl1 19.3(3) 3_444 . . 3_544 ? 
C2 C1 N1 C5 2.6(8) . . . . ? 
C2 C1 N1 Mn1 -176.9(4) . . . . ? 
C4 C5 N1 C1 -0.2(8) . . . . ? 
C4 C5 N1 Mn1 179.3(4) . . . . ? 
N2 Mn1 N1 C1 -135.9(13) . . . . ? 
O1 Mn1 N1 C1 -148.1(4) . . . . ? 
Cl2 Mn1 N1 C1 35.9(4) . . . . ? 
Cl1 Mn1 N1 C1 125.8(4) . . . . ? 
Cl1 Mn1 N1 C1 -62.5(4) 3_544 . . . ? 
N2 Mn1 N1 C5 44.6(16) . . . . ? 
O1 Mn1 N1 C5 32.4(4) . . . . ? 
Cl2 Mn1 N1 C5 -143.6(4) . . . . ? 
Cl1 Mn1 N1 C5 -53.6(4) . . . . ? 
Cl1 Mn1 N1 C5 118.0(4) 3_544 . . . ? 
C18 C19 N2 C15 0.2(9) . . . . ? 
C18 C19 N2 Mn1 -178.3(4) . . . . ? 
C16 C15 N2 C19 0.6(10) . . . . ? 
C16 C15 N2 Mn1 179.1(5) . . . . ? 
N1 Mn1 N2 C19 -137.6(14) . . . . ? 
O1 Mn1 N2 C19 -125.4(5) . . . . ? 
Cl2 Mn1 N2 C19 50.6(5) . . . . ? 
Cl1 Mn1 N2 C19 -39.5(5) . . . . ? 
Cl1 Mn1 N2 C19 149.1(5) 3_544 . . . ? 
N1 Mn1 N2 C15 43.9(16) . . . . ? 
O1 Mn1 N2 C15 56.2(5) . . . . ? 
Cl2 Mn1 N2 C15 -127.9(5) . . . . ? 
Cl1 Mn1 N2 C15 142.0(5) . . . . ? 
Cl1 Mn1 N2 C15 -29.3(5) 3_544 . . . ? 
N2 Mn1 O1 C29 -123.6(4) . . . . ? 
N1 Mn1 O1 C29 55.1(4) . . . . ? 
Cl2 Mn1 O1 C29 -179(100) . . . . ? 
Cl1 Mn1 O1 C29 144.2(4) . . . . ? 
Cl1 Mn1 O1 C29 -32.6(4) 3_544 . . . ? 
C8 C7 S1 C6 -110.9(6) . . . . ? 
S7 C7 S1 C6 70.9(5) . . . . ? 
C3 C6 S1 C7 155.9(5) . . . . ? 
C7 C8 S2 C9 -1.1(6) . . . . ? 
C10 C9 S2 C8 -179.1(6) . . . . ? 
S7 C9 S2 C8 0.7(5) . . . . ? 
C14 C11 S3 C10 -6.8(6) . . . . ? 
S4 C11 S3 C10 174.3(4) . . . . ? 
C9 C10 S3 C11 -172.5(6) . . . . ? 
S6 C10 S3 C11 10.3(4) . . . . ? 
C14 C11 S4 C12 6.3(7) . . . . ? 
S3 C11 S4 C12 -175.1(3) . . . . ? 
C13 C12 S4 C11 -42.5(5) . . . . ? 
C11 C14 S5 C13 18.0(7) . . . . ? 
S6 C14 S5 C13 -159.6(4) . . . . ? 
C12 C13 S5 C14 -53.5(5) . . . . ? 
C9 C10 S6 C14 172.9(6) . . . . ? 
S3 C10 S6 C14 -9.9(4) . . . . ? 
C11 C14 S6 C10 5.4(6) . . . . ? 
S5 C14 S6 C10 -176.7(4) . . . . ? 
C8 C7 S7 C9 -0.5(6) . . . . ? 
S1 C7 S7 C9 177.8(4) . . . . ? 
C10 C9 S7 C7 179.6(6) . . . . ? 
S2 C9 S7 C7 -0.2(4) . . . . ? 
C22 C21 S8 C20 -113.4(6) . . . . ? 
S14 C21 S8 C20 71.6(5) . . . . ? 
C17 C20 S8 C21 158.5(5) . . . . ? 
C21 C22 S9 C23 0.1(6) . . . . ? 
C24 C23 S9 C22 -179.8(6) . . . . ? 
S14 C23 S9 C22 -0.8(4) . . . . ? 
C28 C25 S10 C24 -7.2(6) . . . . ? 
S11 C25 S10 C24 175.2(4) . . . . ? 
C23 C24 S10 C25 -172.2(6) . . . . ? 
S13 C24 S10 C25 9.8(4) . . . . ? 
C28 C25 S11 C26 -17.7(7) . . . . ? 
S10 C25 S11 C26 159.6(4) . . . . ? 
C27 C26 S11 C25 51.7(5) . . . . ? 
C25 C28 S12 C27 -7.9(7) . . . . ? 
S13 C28 S12 C27 172.4(4) . . . . ? 
C26 C27 S12 C28 43.0(5) . . . . ? 
C25 C28 S13 C24 4.3(6) . . . . ? 
S12 C28 S13 C24 -175.9(4) . . . . ? 
C23 C24 S13 C28 173.0(6) . . . . ? 
S10 C24 S13 C28 -9.0(4) . . . . ? 
C22 C21 S14 C23 -1.1(6) . . . . ? 
S8 C21 S14 C23 174.3(4) . . . . ? 
C24 C23 S14 C21 -179.9(6) . . . . ? 
S9 C23 S14 C21 1.1(4) . . . . ? 
  
_diffrn_measured_fraction_theta_max    0.981 
_diffrn_reflns_theta_full              25.17 
_diffrn_measured_fraction_theta_full   0.981 
_refine_diff_density_max    0.320 
_refine_diff_density_min   -0.445 
_refine_diff_density_rms    0.077 
